# Supplementary material for: Marine aquaculture as a source of propagules of invasive fouling species
Source: PeerJ journal article supplement (doi:10.7717/peerj.15456), 2023-06-12
Supplement: FigS3.pdf [file FigS3.pdf]

# *Megabalanus coccopoma*

Current

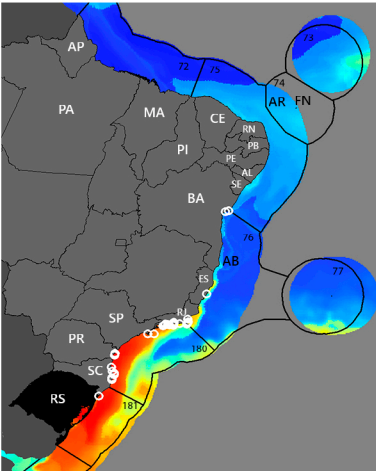

RCP 6.0

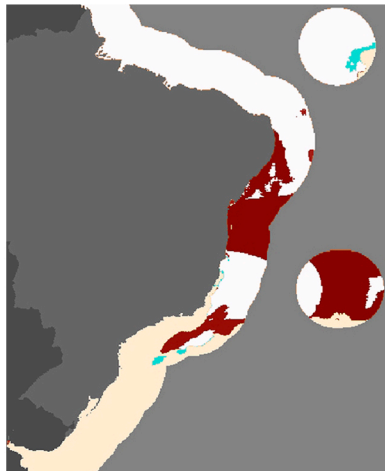

# *Mytilus galloprovincialis*

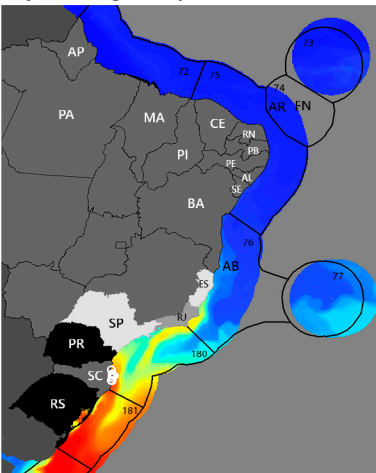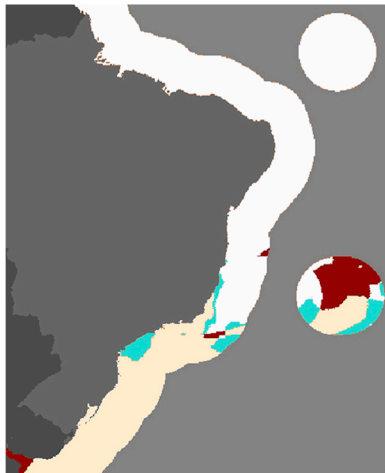

LOW HIGH

Suitability in current and future scenarios.

Suitability in current scenario - lost in the future.

Suitability in future scenario only - available in the future.
