# Supplementary material for: Marine aquaculture as a source of propagules of invasive fouling species
Source: PeerJ. 2023 Jun 12;11:e15456. doi: 10.7717/peerj.15456 (PMC10269578; doi:10.7717/peerj.15456)
Supplement: Supplemental Information 6 [file peerj-11-15456-s006.xlsx]

## Sheet: title
Marine aquaculture as a source of propagules of invasive fouling species
Daniel M. Lins1 and Rosana M. Rocha2
Occurence data used in niche modeling

## Sheet: data
Species	Longitude	Latitude	Source
Aplidium_accarense	-45.1175	-23.5022	Lafargue, F., Wahl, M., 1987.- The didemnid ascidian fauna of France. Annales de l'Institut Oceanographique, Paris, 63 (1): 1-32; López-Legentil, S., Legentil, M. L., Erwin, P. M., & Turon, X. (2015). Harbor networks as introduction gateways: contrasting distribution patterns of native and introduced ascidians. Biological Invasions, 17, 1623-1638; Millar, R.H. 1953. On a collection of ascidians f…
Aplidium_accarense	-45.3689	-23.8117
Aplidium_accarense	-48.6095	-26.7864
Aplidium_accarense	-48.5743	-27.7831
Aplidium_accarense	-48.5539	-27.3094
Aplidium_accarense	-66.9437	10.6082
Aplidium_accarense	-80.0285	26.7815
Aplidium_accarense	-45.6997	-24.1008
Aplidium_accarense	0.5527	40.5751
Aplidium_accarense	2.50877	41.5574
Aplidium_accarense	3.14266	42.1172
Aplidium_accarense	2.79789	41.6716
Aplidium_accarense	2.23103	41.4127
Aplidium_accarense	1.9001	41.249
Aplidium_accarense	2.3101	41.4737
Aplidium_accarense	2.4473	41.5272
Aplidium_accarense	1.9253	41.2568
Aplidium_accarense	2.34917	41.4833
Aplidium_accarense	1.13024	41.0727
Aplidium_accarense	1.8241	41.2317
Aplidium_accarense	1.2537	41.1069
Aplidium_accarense	1.4037	41.1332
Aplidium_accarense	1.7292	41.2054
Aplidium_accarense	1.0637	41.0613
Aplidium_accarense	0.9231	40.9864
Aplidium_accarense	0.7839	40.862
Aplidium_accarense	0.7111	40.809
Aplidium_accarense	3.1192	41.8409
Aplidium_accarense	-48.3698	-27.2931
Aplidium_accarense	-48.3325	-27.2752
Aplidium_accarense	-45.149	-23.816
Aplidium_accarense	-44.2297	-23.0767
Aplidium_accarense	-38.6836	-12.8915
Aplidium_accarense	-45.3556	-23.7742
Aplidium_accarense	-40.2989	-20.3185
Aplidium_accarense	-45.2287	-23.8152
Aplidium_accarense	-45.4169	-23.8237
Aplidium_accarense	-48.6134	-27.7643
Aplidium_accarense	-48.4102	-27.3318
Aplidium_accarense	-16.86923	14.18397
Aplidium_accarense	-16.8701	14.2006
Aplidium_accarense	-0.182537	5.54514
Aplidium_accarense	29.8722	31.2153
Aplidium_accarense	-64.165	10.9806
Aplidium_accarense	-82.2458	9.3345
Botrylloides_giganteus	-117.234	32.7	Reviewed in: Rocha, R. M.; Salonna, M.; Griggio, F.; Ekins, M.; Lambert, G.; Mastrototaro, F.; Fidler, A.; Gissi, C. (2019). The power of combined molecular and morphological analyses for the genus Botrylloides: identification of a potentially global invasive ascidian and description of a new species. Systematics and Biodiversity. 17(5): 509-526.
Botrylloides_giganteus	121.9332	-33.8356
Botrylloides_giganteus	115.7324	-31.8247
Botrylloides_giganteus	17.2112	40.4706
Botrylloides_giganteus	-16.7025	12.5615
Botrylloides_giganteus	-40.2989	-20.319
Botrylloides_giganteus	-48.3738	-27.2854
Botrylloides_giganteus	-44.3415	-23.2186
Botrylloides_giganteus	-45.4226	-23.8286
Botrylloides_giganteus	-46.3241	-24.0077
Botrylloides_giganteus	-45.3937	-23.8304
Botrylloides_giganteus	-45.3568	-23.7726
Botrylloides_giganteus	-48.6116	-26.7824
Botrylloides_giganteus	-48.5644	-27.7356
Botrylloides_giganteus	-48.5461	-27.153
Botrylloides_giganteus	-48.5711	-27.3127
Botrylloides_giganteus	174.8028	-36.839
Botrylloides_giganteus	-43.1688	-22.9478
Botrylloides_giganteus	-42.0129	-22.9653
Botrylloides_giganteus	-45.1174	-23.5021
Didemnum_perlucidum	-17.4692	14.6539	Reviewed in: Dias, J., Rocha, R., Godwin, S., Tovar-Hernández, M. A., Delahoz, M., McKirdy, S., ... & Snow, M. (2016). Investigating the cryptogenic status of the sea squirt Didemnum perlucidum (Tunicata, Ascidiacea) in Australia based on a molecular study of its global distribution. Aquatic Invasions, 11(3), 239-245. Recent reports: Lambert, G. (2019). Fouling ascidians (Chordata: Ascidiacea) of…
Didemnum_perlucidum	-61.7709	16.1278
Didemnum_perlucidum	-61.5444	16.2151
Didemnum_perlucidum	-61.7173	15.9821
Didemnum_perlucidum	-61.5323	16.4117
Didemnum_perlucidum	-61.2719	16.2499
Didemnum_perlucidum	-74.21805	11.24194
Didemnum_perlucidum	-96.12194	19.18805
Didemnum_perlucidum	-48.3636	-25.7355
Didemnum_perlucidum	-48.5696	-27.7551
Didemnum_perlucidum	-41.88	-22.77
Didemnum_perlucidum	-41.98	-22.87
Didemnum_perlucidum	-42.0079	-22.9548
Didemnum_perlucidum	-41.9949	-22.9611
Didemnum_perlucidum	-44.31	-23.01
Didemnum_perlucidum	-44.34	-22.98
Didemnum_perlucidum	-44.16	-23.13
Didemnum_perlucidum	-44.17	-23.14
Didemnum_perlucidum	-43.1707	-22.9506
Didemnum_perlucidum	-43.0464	-22.9725
Didemnum_perlucidum	-40.73	-20.85
Didemnum_perlucidum	-40.2791	-20.2753
Didemnum_perlucidum	-38.5172	-12.9272
Didemnum_perlucidum	-46.3252	-24.0094
Didemnum_perlucidum	-45.1484	-23.8143
Didemnum_perlucidum	-45.3528	-23.769
Didemnum_perlucidum	-45.4234	-23.8297
Didemnum_perlucidum	137.338	-12.54777
Didemnum_perlucidum	113.82138	-28.72583
Didemnum_perlucidum	122.932	-16.3906
Didemnum_perlucidum	114.2916	-21.9746
Didemnum_perlucidum	115.73972	-32.0494
Didemnum_perlucidum	115.73805	-31.82555
Didemnum_perlucidum	106.4468	-3.0141
Didemnum_perlucidum	121.582	-4.0517
Didemnum_perlucidum	124.6615	9.2443
Didemnum_perlucidum	144.6605	13.4601
Didemnum_perlucidum	-157.88583	21.31638
Didemnum_perlucidum	-106.424	23.18194
Didemnum_perlucidum	133.4433	33.43611
Didemnum_perlucidum	166.4391	-22.2853
Didemnum_perlucidum	-149.7775	-17.5229
Didemnum_perlucidum	-149.5712	-17.5283
Didemnum_perlucidum	-16.7113	32.7403
Didemnum_perlucidum	-66.1137	18.4597
Didemnum_perlucidum	-66.618	17.9658
Didemnum_perlucidum	-65.992	18.4573
Didemnum_perlucidum	-94.3231	28.16099
Styela_plicata	-117.2281	32.711	Reviewed by Barros, R. C., Rocha, R. M., & Pie, M. R. (2009). Human-mediated global dispersion of Styela plicata (Tunicata, Ascidiacea). Aquatic Invasions, 4(1), 45-57. Recent reports: Chebbi, N., Mastrototaro, F., & Missaoui, H. (2010). Spatial distribution of ascidians in two Tunisian lagoons of the Mediterranean Sea. Cahiers de Biologie Marine, 51(2), 117; Cinar, M. E. (2014). Checklist of the…
Styela_plicata	-119.6885	34.4062
Styela_plicata	-119.2733	34.2469
Styela_plicata	-119.2134	34.1454
Styela_plicata	-118.4494	33.9723
Styela_plicata	-118.428	33.8478
Styela_plicata	-118.279	33.7164
Styela_plicata	-17.0239	21.0355
Styela_plicata	-17.0405	20.9121
Styela_plicata	-17.4275	14.7071
Styela_plicata	-17.3988	14.6693
Styela_plicata	-8.267	37.0784
Styela_plicata	-9.09	39.59
Styela_plicata	-9.3769	39.3518
Styela_plicata	-82.7206	27.7195
Styela_plicata	-64.8471	32.2487
Styela_plicata	-64.663	32.354
Styela_plicata	-82.9255	22.9824
Styela_plicata	-68.9643	12.1342
Styela_plicata	-80.152	25.737
Styela_plicata	-61.53	16.2222
Styela_plicata	-74.0555	40.4561
Styela_plicata	-66.1149	18.4599
Styela_plicata	-66.9069	17.9619
Styela_plicata	-64.7396	17.6909
Styela_plicata	-64.9227	18.3352
Styela_plicata	-64.8501	18.3256
Styela_plicata	-61.1922	13.1269
Styela_plicata	-76.6629	34.7141
Styela_plicata	-74.0313	40.7152
Styela_plicata	-64.15	10.983
Styela_plicata	-38.4559	-12.7977
Styela_plicata	-48.319	-25.5719
Styela_plicata	-44.283	-23.083
Styela_plicata	-42.0189	-22.9716
Styela_plicata	-42.0075	-22.8857
Styela_plicata	-43.9024	-22.9276
Styela_plicata	-43.0464	-22.9725
Styela_plicata	-43.116	-22.929
Styela_plicata	-41.9949	-22.9611
Styela_plicata	-43.1707	-22.9506
Styela_plicata	-48.5517	-27.6144
Styela_plicata	-40.3	-20.32
Styela_plicata	-46.324	-24.0081
Styela_plicata	-45.421	-23.827
Styela_plicata	-45.4072	-23.8111
Styela_plicata	-56.2087	-34.8958
Styela_plicata	151.1908	-33.9735
Styela_plicata	152.0614	-32.6994
Styela_plicata	151.1286	-34.0659
Styela_plicata	150.92	-34.4646
Styela_plicata	152.912	-25.294
Styela_plicata	153.119	-27.226
Styela_plicata	146.84	-19.26
Styela_plicata	135.47	-34.612
Styela_plicata	135.8761	-34.7189
Styela_plicata	137.7659	-33.0116
Styela_plicata	138.241	-35.5009
Styela_plicata	145.0352	-38.2127
Styela_plicata	144.368	-38.143
Styela_plicata	144.574	-38.0145
Styela_plicata	144.6908	-38.2127
Styela_plicata	115.6399	-33.3128
Styela_plicata	115.743	-32.047
Styela_plicata	115.76	-32.209
Styela_plicata	115.7425	-32.0635
Styela_plicata	115.6905	-32.2311
Styela_plicata	114.2916	-21.9746
Styela_plicata	115.526	-20.439
Styela_plicata	121.55	-18.95
Styela_plicata	152.827	-25.246
Styela_plicata	153.12	-27.23
Styela_plicata	151.256	-33.8402
Styela_plicata	113.907	-25.814
Styela_plicata	51.0498	9.6829
Styela_plicata	32.5557	29.9422
Styela_plicata	31.0251	-29.8649
Styela_plicata	-6.5555	36.5722
Styela_plicata	-5.4388	36.1833
Styela_plicata	-5.3633	36.1625
Styela_plicata	8.7422	41.9302
Styela_plicata	13.6347	45.0766
Styela_plicata	29.8779	31.199
Styela_plicata	3.1341	42.481
Styela_plicata	5.3604	43.2942
Styela_plicata	34.6534	31.8434
Styela_plicata	8.9265	44.3993
Styela_plicata	14.253	40.8309
Styela_plicata	17.2239	40.4759
Styela_plicata	12.338	45.428
Styela_plicata	16.8489	41.1353
Styela_plicata	10.3093	36.8082
Styela_plicata	175.3276	-36.4818
Styela_plicata	-118.1817	33.746
Styela_plicata	114.459	22.558
Styela_plicata	114.22	22.449
Styela_plicata	137.2386	34.6909
Styela_plicata	130.2186	32.9779
Styela_plicata	130.404	33.05
Styela_plicata	136.121	36.2017
Styela_plicata	136.8409	34.7661
Styela_plicata	130.6015	31.2944
Styela_plicata	135.9888	33.6836
Styela_plicata	135.36	33.6913
Styela_plicata	131.51	33.276
Styela_plicata	140.9191	40.9949
Styela_plicata	136.9357	37.1168
Styela_plicata	135.33	34.48
Styela_plicata	139.3202	35.3053
Styela_plicata	133.2914	33.984
Styela_plicata	139.7798	35.5013
Styela_plicata	137.239	37.3
Styela_plicata	133.4493	33.4513
Styela_plicata	139.6634	35.4504
Styela_plicata	-118.0605	33.7126
Styela_plicata	-117.9083	33.6084
Styela_plicata	-117.6944	33.4585
Styela_plicata	-117.427	33.2077
Styela_plicata	-117.254	32.7761
Styela_plicata	-117.1284	32.663
Styela_plicata	0.6256	40.6169
Schizoporella_errata	137.645099	-35.655379	Miranda et al. (2018) DOI: https://doi.org/10.1016/j.marpolbul.2018.03.023; Oricchio et al. (2019) DOI: https://doi.org/10.1016/j.marpolbul.2019.07.013; Xavier et al. (2021) DOI: https://doi.org/10.1016/j.marpolbul.2021.112310
Schizoporella_errata	114.33376	22.471422
Schizoporella_errata	3.51475	43.27058
Schizoporella_errata	3.98083	43.49926
Schizoporella_errata	7.16755	43.65638
Schizoporella_errata	135.859043	-34.718631
Schizoporella_errata	6.84389	43.40901
Schizoporella_errata	137.35396	-34.933844
Schizoporella_errata	-2.973333	58.9581
Schizoporella_errata	-2.977733	59.321999
Schizoporella_errata	-122.42156	37.80798
Schizoporella_errata	-122.31721	37.86759
Schizoporella_errata	-122.37022	37.81486
Schizoporella_errata	-122.48322	37.97203
Schizoporella_errata	-122.47763	37.91464
Schizoporella_errata	-122.308333	37.583333
Schizoporella_errata	0.17	40.09
Schizoporella_errata	-122.243056	37.572778
Schizoporella_errata	-122.150556	37.554167
Schizoporella_errata	-9.79491	51.81329
Schizoporella_errata	14.207844	40.803419
Schizoporella_errata	-81.081667	30.478167
Schizoporella_errata	144	-40
Schizoporella_errata	151.28	-33.8
Schizoporella_errata	52.7185	24.184167
Schizoporella_errata	54.32	24.45
Schizoporella_errata	-157.967262	21.32136
Schizoporella_errata	174.7698	-36.8425
Schizoporella_errata	0.24	38.75
Schizoporella_errata	115.336667	-33.63
Schizoporella_errata	-79.8267	32.4117
Schizoporella_errata	-78.66	32.8067
Schizoporella_errata	-90.1628	29.0472
Schizoporella_errata	-80.223333	27.356383
Schizoporella_errata	-93.816667	27.876667
Schizoporella_errata	-82.808333	28.94
Schizoporella_errata	35.066667	32.916667
Schizoporella_errata	16.55	43.5
Schizoporella_errata	-9.866667	48.7
Schizoporella_errata	-177.363	28.2134
Schizoporella_errata	117.883	-35.066
Schizoporella_errata	-74.103036	39.007514
Schizoporella_errata	174.1666	-35.2
Schizoporella_errata	109.65	18.233333
Schizoporella_errata	-38.796	-3.5321
Schizoporella_errata	-38.483	-3.7114
Schizoporella_errata	-35.1924	-5.7505
Schizoporella_errata	-34.8379	-6.9763
Schizoporella_errata	-34.857	-7.0349
Schizoporella_errata	-34.9576	-8.3952
Schizoporella_errata	-35.7276	-9.6778
Schizoporella_errata	-38.5099	-12.9616
Schizoporella_errata	-40.2887	-20.3001
Schizoporella_errata	-42.0177	-22.9726
Schizoporella_errata	-45.387	-23.8044
Watersipora_subtorquata	126.559525	33.237473	Vieira et al. (2014) DOI: https://doi.org/10.11646/zootaxa.3857.2.1; Miranda et al. (2018) DOI: https://doi.org/10.1016/j.marpolbul.2018.03.023; Oricchio et al. (2019) DOI: https://doi.org/10.1016/j.marpolbul.2019.07.013; Xavier et al. (2021) DOI: https://doi.org/10.1016/j.marpolbul.2021.112310
Watersipora_subtorquata	125.984955	37.182117
Watersipora_subtorquata	17.9492	-33.0099
Watersipora_subtorquata	18.47235	-34.35667
Watersipora_subtorquata	-45.04528	-23.45111
Watersipora_subtorquata	144.97	-37.82
Watersipora_subtorquata	-157.75	21.275
Watersipora_subtorquata	149.883	-37.07999
Watersipora_subtorquata	144.9	-37.82
Watersipora_subtorquata	145.23	-38.28
Watersipora_subtorquata	144.37	-38.12
Watersipora_subtorquata	-157.894	21.3197
Watersipora_subtorquata	144.95	-37.9
Watersipora_subtorquata	147.621	-38.3497
Watersipora_subtorquata	-157.967262	21.324878
Watersipora_subtorquata	145	-37.95
Watersipora_subtorquata	144.67	-38.27
Watersipora_subtorquata	18.65	-34.191667
Watersipora_subtorquata	18.45	-34.2
Watersipora_subtorquata	18.030703	-33.132147
Watersipora_subtorquata	21.166667	-34.916667
Watersipora_subtorquata	109.65	18.233333
Watersipora_subtorquata	110.683333	19.366667
Watersipora_subtorquata	-38.483	-3.7114
Watersipora_subtorquata	-35.1924	-5.7505
Watersipora_subtorquata	-35.7276	-9.6778
Watersipora_subtorquata	-38.5099	-12.9616
Watersipora_subtorquata	-40.2887	-20.3001
Watersipora_subtorquata	-42.0177	-22.9726
Watersipora_subtorquata	-44.3474	-23.19
Watersipora_subtorquata	-45.387	-23.8044
Watersipora_subtorquata	-79.91703	26.454765
Watersipora_subtorquata	-64.685885	32.178998
Watersipora_subtorquata	-66.130916	18.477578
Watersipora_subtorquata	-75.60355	10.173854
Watersipora_subtorquata	-67.053353	10.657678
Watersipora_subtorquata	-3.025267	5.034257
Watersipora_subtorquata	10.168844	43.736587
Watersipora_subtorquata	15.990592	38.922144
Watersipora_subtorquata	30.237218	31.368148
Watersipora_subtorquata	34.781989	27.085118
Watersipora_subtorquata	35.847987	35.391024
Watersipora_subtorquata	41.29727	15.746194
Watersipora_subtorquata	49.056216	30.079432
Watersipora_subtorquata	59.601911	22.672938
Watersipora_subtorquata	167.910517	-21.679784
Watersipora_subtorquata	153.280798	-27.204099
Watersipora_subtorquata	148.803445	-20.581266
Megabalanus_coccopoma	151.252523	-33.838585	GBIF.org GBIF Occurrence Download https://doi.org/10.15468/dl.8btgza
Megabalanus_coccopoma	-97.268847	27.487488
Megabalanus_coccopoma	153.569212	-28.198494
Megabalanus_coccopoma	-80.318864	27.457703
Megabalanus_coccopoma	-97.322252	27.715854
Megabalanus_coccopoma	-84.715708	9.923146
Megabalanus_coccopoma	-94.955353	29.191133
Megabalanus_coccopoma	-87.629142	30.256769
Megabalanus_coccopoma	-94.797882	29.282534
Megabalanus_coccopoma	-81.216044	29.670112
Megabalanus_coccopoma	-97.054232	27.828451
Megabalanus_coccopoma	151.275092	-33.800088
Megabalanus_coccopoma	6.25	53.5
Megabalanus_coccopoma	138.786732	35.02489
Megabalanus_coccopoma	-85.73189	30.12357
Megabalanus_coccopoma	-80.819745	29.150482
Megabalanus_coccopoma	-95.090028	29.104967
Megabalanus_coccopoma	-80.975266	29.144613
Megabalanus_coccopoma	-86.507233	30.381572
Megabalanus_coccopoma	-81.229391	29.705984
Megabalanus_coccopoma	6	53.45
Megabalanus_coccopoma	-80.7542	24.7651
Megabalanus_coccopoma	-49.73072	-29.35167
Megabalanus_coccopoma	-48.57822	-27.8825
Megabalanus_coccopoma	-48.58844	-27.86506
Megabalanus_coccopoma	-97.1525	25.821944
Megabalanus_coccopoma	-87.563833	30.24
Megabalanus_coccopoma	-97.738611	23.776944
Megabalanus_coccopoma	-97.7225	24.616944
Megabalanus_coccopoma	-97.742222	24.491111
Megabalanus_coccopoma	-97.423056	25.243056
Megabalanus_coccopoma	-85.7047	30.1067
Megabalanus_coccopoma	-80.3197	32.4872
Megabalanus_coccopoma	-78.5542	33.8483
Megabalanus_coccopoma	4.15	52
Megabalanus_coccopoma	-81.390409	30.397383
Megabalanus_coccopoma	-76.35473	34.82973
Megabalanus_coccopoma	-81.0042	31.8042
Megabalanus_coccopoma	-77.790241	34.21166
Megabalanus_coccopoma	-79.979535	32.639625
Megabalanus_coccopoma	-77.964993	33.840336
Megabalanus_coccopoma	-79.8867	32.6857
Megabalanus_coccopoma	-79.8597	32.7583
Megabalanus_coccopoma	-106.42	23.22
Megabalanus_coccopoma	-116.6	31.783
Megabalanus_coccopoma	-96.55	21.27
Megabalanus_coccopoma	151.24049	-33.865
Megabalanus_coccopoma	-43.194524	-23.067656
Megabalanus_coccopoma	-106.418333	23.185
Megabalanus_coccopoma	-79.683333	8.866667
Megabalanus_coccopoma	-80.733333	-0.95
Megabalanus_coccopoma	-43.565116	-23.060505
Megabalanus_coccopoma	-38.363415	-12.951109
Megabalanus_coccopoma	-42.014245	-22.964796
Megabalanus_coccopoma	-44.883333	-23.815
Megabalanus_coccopoma	-43.688339	-22.992334
Megabalanus_coccopoma	-43.165249	-22.790809
Megabalanus_coccopoma	-41.904611	-22.756954
Megabalanus_coccopoma	-43.155861	-22.943959
Megabalanus_coccopoma	-41.982939	-22.868843
Megabalanus_coccopoma	-41.936534	-22.536039
Megabalanus_coccopoma	-43.980359	-23.055311
Megabalanus_coccopoma	-43.170916	-22.929444
Megabalanus_coccopoma	-48.3757	-27.460923
Megabalanus_coccopoma	-96.24333	15.68
Megabalanus_coccopoma	-95.1417	15.99167
Megabalanus_coccopoma	-90.2883	-0.4347
Megabalanus_coccopoma	-114.8	31
Megabalanus_coccopoma	-122.44467	37.806782
Megabalanus_coccopoma	-99.972907	16.2966
Megabalanus_coccopoma	-79	9
Megabalanus_coccopoma	-105.733333	22.516667
Megabalanus_coccopoma	-106.833333	23.716667
Megabalanus_coccopoma	-40.281966	-20.299574
Megabalanus_coccopoma	-45.421959	-23.827287
Megabalanus_coccopoma	-42.638733	-22.937277
Megabalanus_coccopoma	-43.891307	-22.952832
Megabalanus_coccopoma	-38.634069	-13.001833
Megabalanus_coccopoma	-44.10558	-23.137804
Megabalanus_coccopoma	122	13
Mytilus_galloprovincialis	-119.209978	34.144639	GBIF.org GBIF Occurrence Download https://doi.org/10.15468/dl.fhek3u
Mytilus_galloprovincialis	-122.495948	37.497316
Mytilus_galloprovincialis	27.026903	-33.558955
Mytilus_galloprovincialis	3.839227	43.50527
Mytilus_galloprovincialis	-4.449052	36.673323
Mytilus_galloprovincialis	-117.223655	32.714954
Mytilus_galloprovincialis	-117.133049	32.582974
Mytilus_galloprovincialis	3.967278	43.554037
Mytilus_galloprovincialis	-118.129163	33.752212
Mytilus_galloprovincialis	-118.045783	33.697337
Mytilus_galloprovincialis	0.781032	40.768381
Mytilus_galloprovincialis	-118.932587	34.045208
Mytilus_galloprovincialis	-118.167115	33.711486
Mytilus_galloprovincialis	14.038639	42.654267
Mytilus_galloprovincialis	174	-41.3
Mytilus_galloprovincialis	22.767989	-34.028991
Mytilus_galloprovincialis	18.432695	-34.141761
Mytilus_galloprovincialis	18.318416	-34.144702
Mytilus_galloprovincialis	18.4529	-34.1913
Mytilus_galloprovincialis	18.408028	-33.898903
Mytilus_galloprovincialis	18.466214	-34.299103
Mytilus_galloprovincialis	-122.261558	37.805214
Mytilus_galloprovincialis	18.321415	-34.140093
Mytilus_galloprovincialis	-122.31094	37.57958
Mytilus_galloprovincialis	12.280273	44.544383
Mytilus_galloprovincialis	18.811807	42.279858
Mytilus_galloprovincialis	-9.237136	38.638423
Mytilus_galloprovincialis	23.331751	39.216063
Mytilus_galloprovincialis	37.802063	44.679998
Mytilus_galloprovincialis	20.725277	38.808457
Mytilus_galloprovincialis	-9.341109	39.244616
Mytilus_galloprovincialis	23.817572	40.577394
Mytilus_galloprovincialis	4.025278	43.555557
Mytilus_galloprovincialis	-7.963042	36.985797
Mytilus_galloprovincialis	147.4	-42.9
Mytilus_galloprovincialis	3.700376	43.424811
Mytilus_galloprovincialis	-122.366608	37.812428
Mytilus_galloprovincialis	-2.404725	36.82655
Mytilus_galloprovincialis	13.704379	45.589271
Mytilus_galloprovincialis	31.194741	46.627425
Mytilus_galloprovincialis	119.620105	39.914866
Mytilus_galloprovincialis	-8.87	42.56
Mytilus_galloprovincialis	19.388459	40.525351
Mytilus_galloprovincialis	-7.857931	36.97697
Mytilus_galloprovincialis	12.251519	44.670242
Mytilus_galloprovincialis	28.560677	43.681282
Mytilus_galloprovincialis	-0.321939	39.47509
Mytilus_galloprovincialis	174.8	-36.4
Mytilus_galloprovincialis	-72.977449	-36.595628
Mytilus_galloprovincialis	12.289194	44.46302
Mytilus_galloprovincialis	26.556814	39.106231
Mytilus_galloprovincialis	27.752714	42.262522
Mytilus_galloprovincialis	130.2898	32.4832
Mytilus_galloprovincialis	129.7812	32.6041
Mytilus_galloprovincialis	3.51475	43.27058
Mytilus_galloprovincialis	130.0444	32.5126
Mytilus_galloprovincialis	130.0322	32.2743
Mytilus_galloprovincialis	130.0931	32.5296
Mytilus_galloprovincialis	119.484169	39.810833
Mytilus_galloprovincialis	5.21863	43.32892
Mytilus_galloprovincialis	6.77323	43.40714
Mytilus_galloprovincialis	130.4782	32.2867
Mytilus_galloprovincialis	6.59263	43.16772
Mytilus_galloprovincialis	9.45501	42.7125
Mytilus_galloprovincialis	15.162504	44.230496
Mytilus_galloprovincialis	15.162008	43.941218
Mytilus_galloprovincialis	28.629564	43.919193
Mytilus_galloprovincialis	131.9045	33.0133
Mytilus_galloprovincialis	131.8376	33.2479
Mytilus_galloprovincialis	131.9854	32.8928
Mytilus_galloprovincialis	131.9422	32.8368
Mytilus_galloprovincialis	129.9989	32.7621
Mytilus_galloprovincialis	130.9046	33.8921
Mytilus_galloprovincialis	130.9174	33.8959
Mytilus_galloprovincialis	-117.706183	33.460847
Mytilus_galloprovincialis	130.7516	31.4298
Mytilus_galloprovincialis	130.7831	31.5817
Mytilus_galloprovincialis	130.8139	31.6781
Mytilus_galloprovincialis	130.7994	31.6976
Mytilus_galloprovincialis	130.6977	31.4969
Mytilus_galloprovincialis	130.2337	32.8662
Mytilus_galloprovincialis	130.1293	32.6467
Mytilus_galloprovincialis	130.2336	32.6205
Mytilus_galloprovincialis	130.3549	32.8232
Mytilus_galloprovincialis	147.411	-43.202
Mytilus_galloprovincialis	5.06104	43.42046
Mytilus_galloprovincialis	131.617	33.3726
Mytilus_galloprovincialis	-2.07273	48.641
Mytilus_galloprovincialis	-118.676344	34.037129
Mytilus_galloprovincialis	-8.784	41.488
Mytilus_galloprovincialis	23.06346	-34.08198
Mytilus_galloprovincialis	131.737	33.5315
Mytilus_galloprovincialis	130.5131	32.8874
Mytilus_galloprovincialis	129.9493	33.5276
Mytilus_galloprovincialis	129.6534	32.9894
Mytilus_galloprovincialis	3.60344	43.42059
Mytilus_galloprovincialis	131.4627	31.7342
Mytilus_galloprovincialis	131.8713	32.7521
Mytilus_galloprovincialis	131.8774	32.7918
Mytilus_galloprovincialis	130.4766	32.9054
Mytilus_galloprovincialis	129.4361	33.2375
Mytilus_galloprovincialis	3.15564	43.11826
Mytilus_galloprovincialis	3.19296	43.17562
Mytilus_galloprovincialis	130.1408	33.5236
Mytilus_galloprovincialis	12.555141	44.078953
Mytilus_galloprovincialis	130.6012	33.8779
Mytilus_galloprovincialis	17.973889	-33.034167
Mytilus_galloprovincialis	-73.66	40.59
Mytilus_galloprovincialis	5.22833	43.19861
Mytilus_galloprovincialis	130.5897	32.6259
Mytilus_galloprovincialis	115.77	-32.15
Mytilus_galloprovincialis	22.3882	-34.0558
Mytilus_galloprovincialis	3.109689	42.142246
Mytilus_galloprovincialis	129.8524	33.4468
Mytilus_galloprovincialis	3.24101	43.21331
Mytilus_galloprovincialis	130.1618	33.6144
Mytilus_galloprovincialis	129.6446	33.3645
Mytilus_galloprovincialis	6.9413	43.51759
Mytilus_galloprovincialis	129.7669	33.3539
Mytilus_galloprovincialis	135.124455	34.64144
Mytilus_galloprovincialis	12.656765	44.116661
Mytilus_galloprovincialis	130.47	33.762
Mytilus_galloprovincialis	131.0878	33.634
Mytilus_galloprovincialis	-121.880517	36.953225
Mytilus_galloprovincialis	130.1477	33.0712
Mytilus_galloprovincialis	130.2349	33.6144
Mytilus_galloprovincialis	130.9662	33.8096
Mytilus_galloprovincialis	-121.78768	36.806862
Mytilus_galloprovincialis	145.479627	-38.554576
Mytilus_galloprovincialis	149.9395	-36.8182
Mytilus_galloprovincialis	129.7126	32.8352
Mytilus_galloprovincialis	4.13854	43.48295
Mytilus_galloprovincialis	3.09937	42.5237
Mytilus_galloprovincialis	149.927664	-36.942947
Mytilus_galloprovincialis	6.38371	43.14355
Mytilus_galloprovincialis	-3.848	48.629
Mytilus_galloprovincialis	3.05683	42.92717
Mytilus_galloprovincialis	-8.908314	40.184332
Mytilus_galloprovincialis	-8.768317	40.568048
Mytilus_galloprovincialis	28.583679	43.835518
Mytilus_galloprovincialis	14.723225	42.093891
Mytilus_galloprovincialis	13.92	44.82
Mytilus_galloprovincialis	150.049526	-36.584936
Mytilus_galloprovincialis	150.001259	-36.662023
Mytilus_galloprovincialis	150.055961	-36.542293
Mytilus_galloprovincialis	149.992925	-36.686814
Mytilus_galloprovincialis	17.976466	-32.705462
Mytilus_galloprovincialis	145.1739	-41.9293
Mytilus_galloprovincialis	174.981317	-36.880767
Mytilus_galloprovincialis	-4.54454	52.13566
Mytilus_galloprovincialis	7.11805	43.54371
Mytilus_galloprovincialis	6.54209	43.18232
Mytilus_galloprovincialis	27.71	42.37
Mytilus_galloprovincialis	5.77523	43.07324
Mytilus_galloprovincialis	147.2115	-43.3823
Mytilus_galloprovincialis	147.2178	-43.4318
Mytilus_galloprovincialis	147.234	-3.3637
Mytilus_galloprovincialis	147.31	-43.2964
Mytilus_galloprovincialis	147.2671	-43.1128
Mytilus_galloprovincialis	145.4706	-40.8705
Mytilus_galloprovincialis	150.080912	-36.423511
Mytilus_galloprovincialis	147.2397	-43.1749
Mytilus_galloprovincialis	147.2525	-43.1906
Mytilus_galloprovincialis	148.3571	-41.2828
Mytilus_galloprovincialis	148.3106	-41.2806
Mytilus_galloprovincialis	148.2538	-41.3241
Mytilus_galloprovincialis	148.0784	-42.17
Mytilus_galloprovincialis	148.2707	-41.1945
Mytilus_galloprovincialis	-2.446667	49.47667
Mytilus_galloprovincialis	6.73277	43.40458
Mytilus_galloprovincialis	6.16501	43.00099
Mytilus_galloprovincialis	-0.48	38.16
Mytilus_galloprovincialis	-0.4	38.35
Mytilus_galloprovincialis	-0.43	38.35
Mytilus_galloprovincialis	147.6789	-42.9919
Mytilus_galloprovincialis	0.008	38.62
Mytilus_galloprovincialis	-0.01	38.61
Mytilus_galloprovincialis	-0.12	38.5
Mytilus_galloprovincialis	-0.08	38.53
Mytilus_galloprovincialis	-0.27	39.28
Mytilus_galloprovincialis	-0.71	37.91
Mytilus_galloprovincialis	0.18	38.81
Mytilus_galloprovincialis	-0.32	38.47
Mytilus_galloprovincialis	-0.5	38.2
Mytilus_galloprovincialis	-0.38	38.42
Mytilus_galloprovincialis	-0.51	38.19
Mytilus_galloprovincialis	-5.428315	50.18608
Mytilus_galloprovincialis	-5.198299	50.32193
Mytilus_galloprovincialis	13.636637	45.081541
Mytilus_galloprovincialis	27.89	42.95
Mytilus_galloprovincialis	144.774067	-38.356
Mytilus_galloprovincialis	168.359358	-46.612189
Mytilus_galloprovincialis	147.8932	-42.7508
Mytilus_galloprovincialis	147.3616	-43.1244
Mytilus_galloprovincialis	148.2865	-41.8639
Mytilus_galloprovincialis	148.2976	-42.1401
Mytilus_galloprovincialis	147.8137	-42.8886
Mytilus_galloprovincialis	174.751833	-36.7034
Mytilus_galloprovincialis	174.0442	-36.88065
Mytilus_galloprovincialis	17.057098	43.263351
Mytilus_galloprovincialis	-0.2687	49.4062
Mytilus_galloprovincialis	-0.07183	49.3239
Mytilus_galloprovincialis	8.7438	41.91895
Mytilus_galloprovincialis	8.5902	41.94166
Mytilus_galloprovincialis	8.61813	41.92494
Mytilus_galloprovincialis	151.583333	-34
Mytilus_galloprovincialis	147.722	-42.8867
Mytilus_galloprovincialis	143.516944	44.253333
Mytilus_galloprovincialis	147.8714	-42.8246
Mytilus_galloprovincialis	4.66016	43.34662
Mytilus_galloprovincialis	1.87572	51.07349
Mytilus_galloprovincialis	1.73852	51.02144
Mytilus_galloprovincialis	4.57704	43.39517
Mytilus_galloprovincialis	1.48328	50.82985
Mytilus_galloprovincialis	147.0253	-43.3156
Mytilus_galloprovincialis	147.0888	-43.2906
Mytilus_galloprovincialis	-0.62	38.16
Mytilus_galloprovincialis	147.4952	-42.9111
Mytilus_galloprovincialis	147.6004	-42.8674
Mytilus_galloprovincialis	148.0378	-42.6629
Mytilus_galloprovincialis	148.0458	-42.6097
Mytilus_galloprovincialis	147.9434	-40.7761
Mytilus_galloprovincialis	148.0337	-40.7551
Mytilus_galloprovincialis	-119.828517	34.414233
Mytilus_galloprovincialis	-8.742778	41.31
Mytilus_galloprovincialis	151.23	-33.86
Mytilus_galloprovincialis	-8.73	41.2675
Mytilus_galloprovincialis	-8.689722	41.168056
Mytilus_galloprovincialis	6.18438	43.10891
Mytilus_galloprovincialis	8.1256	53.5119
Mytilus_galloprovincialis	141.477265	38.645533
Mytilus_galloprovincialis	7.03167	43.52083
Mytilus_galloprovincialis	145.5134	-40.8572
Mytilus_galloprovincialis	145.3564	-40.8514
Mytilus_galloprovincialis	145.317	-40.8374
Mytilus_galloprovincialis	147.9384	-42.6148
Mytilus_galloprovincialis	148.0003	-42.3079
Mytilus_galloprovincialis	148.3069	-41.9311
Mytilus_galloprovincialis	147.2904	-43.0227
Mytilus_galloprovincialis	146.9906	-43.4352
Mytilus_galloprovincialis	147.0113	-3.3422
Mytilus_galloprovincialis	146.995	-43.4805
Mytilus_galloprovincialis	146.9151	-43.5706
Mytilus_galloprovincialis	-8.850278	41.694444
Mytilus_galloprovincialis	147.954	-42.6617
Mytilus_galloprovincialis	-179.975	-42.815
Mytilus_galloprovincialis	174.001	-41.15
Mytilus_galloprovincialis	174.833	-41.317
Mytilus_galloprovincialis	147.3336	-43.0244
Mytilus_galloprovincialis	18.461117	-34.320208
Mytilus_galloprovincialis	147.4845	-43.0275
Mytilus_galloprovincialis	147.9229	-43.0087
Mytilus_galloprovincialis	147.8319	-42.9706
Mytilus_galloprovincialis	-5.691857	57.326024
Mytilus_galloprovincialis	148.0763	-42.1235
Mytilus_galloprovincialis	148.1348	-42.0915
Mytilus_galloprovincialis	147.8558	-43.1628
Mytilus_galloprovincialis	147.6553	-42.9939
Mytilus_galloprovincialis	10.31931	36.823325
Mytilus_galloprovincialis	17.982119	-33.142875
Mytilus_galloprovincialis	147.106	-43.412
Mytilus_galloprovincialis	147.5313	-42.8465
Mytilus_galloprovincialis	147.5479	-42.9656
Mytilus_galloprovincialis	22.951289	-34.078581
Mytilus_galloprovincialis	-8.002059	37.011377
Mytilus_galloprovincialis	17.0553	-29.709
Mytilus_galloprovincialis	13.6281	43.5481
Mytilus_galloprovincialis	115.716667	-32.183333
Mytilus_galloprovincialis	146.8229	-43.611
Mytilus_galloprovincialis	147.3219	-43.313
Mytilus_galloprovincialis	13.662176	45.547993
Mytilus_galloprovincialis	145.2894	-40.7663
Mytilus_galloprovincialis	147.3678	-43.3504
Mytilus_galloprovincialis	177.147339	-44.006668
Mytilus_galloprovincialis	172.2902	-44.5588
Mytilus_galloprovincialis	-8.89	42.11
Mytilus_galloprovincialis	135.395	33.710833
Mytilus_galloprovincialis	27.949422	-32.994567
Mytilus_galloprovincialis	25.655092	-33.981161
Mytilus_galloprovincialis	-123.013611	48.521389
Mytilus_galloprovincialis	17.224167	-30.188972
Mytilus_galloprovincialis	148.2954	-41.6931
Mytilus_galloprovincialis	148.2693	-41.7889
Mytilus_galloprovincialis	18.301606	-32.096378
Mytilus_galloprovincialis	-5.42716	50.19592
Mytilus_galloprovincialis	24.797886	-34.198825
Mytilus_galloprovincialis	-123.321533	49.001844
Mytilus_galloprovincialis	148.2853	-42.1453
Mytilus_galloprovincialis	148.2849	-42.2993
Mytilus_galloprovincialis	148.2436	-42.1063
Mytilus_galloprovincialis	10.331111	43.473056
Mytilus_galloprovincialis	150	55
Mytilus_galloprovincialis	-119.69126	34.40691
Mytilus_galloprovincialis	-120.84916	35.35696
Mytilus_galloprovincialis	-118.45685	33.97834
Mytilus_galloprovincialis	-118.28011	33.71645
Mytilus_galloprovincialis	-123.05847	38.33207
Mytilus_galloprovincialis	-124.22692	40.74258
Mytilus_galloprovincialis	-124.18604	40.79773
Mytilus_galloprovincialis	-122.96796	38.23141
Mytilus_galloprovincialis	-117.93636	33.62128
Mytilus_galloprovincialis	-117.89573	33.60966
Mytilus_galloprovincialis	147.5234	-42.9944
Mytilus_galloprovincialis	147.3921	-40.9968
Mytilus_galloprovincialis	145.133333	-38.433333
Mytilus_galloprovincialis	3.1822	42.49468
Mytilus_galloprovincialis	3.92666	43.48013
Mytilus_galloprovincialis	145.2223	-42.2184
Mytilus_galloprovincialis	28.171198	36.251808
Mytilus_galloprovincialis	-117.12693	32.64773
Mytilus_galloprovincialis	-122.47366	37.83187
Mytilus_galloprovincialis	-117.23476	32.68613
Mytilus_galloprovincialis	148.2773	-41.4356
Mytilus_galloprovincialis	-122.35035	37.91369
Mytilus_galloprovincialis	-122.44446	37.88826
Mytilus_galloprovincialis	174.816667	-36.8
Mytilus_galloprovincialis	-122.31721	37.86759
Mytilus_galloprovincialis	-122.26949	38.10147
Mytilus_galloprovincialis	-122.43262	38.04456
Mytilus_galloprovincialis	-122.48322	37.97203
Mytilus_galloprovincialis	147.8974	-42.5683
Mytilus_galloprovincialis	147.6669	-42.9481
Mytilus_galloprovincialis	147.8446	-43.0547
Mytilus_galloprovincialis	147.3975	-42.8818
Mytilus_galloprovincialis	146.5303	-41.12
Mytilus_galloprovincialis	147.9619	-43.1422
Mytilus_galloprovincialis	146.7894	-41.0583
Mytilus_galloprovincialis	147.1483	-41.0123
Mytilus_galloprovincialis	19.473392	40.363426
Mytilus_galloprovincialis	150.33082	-35.6336
Mytilus_galloprovincialis	115.733333	-32.05
Mytilus_galloprovincialis	20.49	38.17
Mytilus_galloprovincialis	-122.22427	37.56072
Mytilus_galloprovincialis	175.31825	-36.197361
Mytilus_galloprovincialis	-122.38169	37.66313
Mytilus_galloprovincialis	-122.38557	37.75152
Mytilus_galloprovincialis	-122.19306	37.69625
Mytilus_galloprovincialis	3.603172	43.352146
Mytilus_galloprovincialis	136.821667	33.964167
Mytilus_galloprovincialis	-5.39307	50.23875
Mytilus_galloprovincialis	150.75	-34.75
Mytilus_galloprovincialis	152.25	-33.25
Mytilus_galloprovincialis	152.25	-33.75
Mytilus_galloprovincialis	151.25	-35.25
Mytilus_galloprovincialis	151.25	-33.75
Mytilus_galloprovincialis	153.25	-32.75
Mytilus_galloprovincialis	152.75	-32.25
Mytilus_galloprovincialis	151.25	-34.25
Mytilus_galloprovincialis	151.25	-34.75
Mytilus_galloprovincialis	150.25	-36.25
Mytilus_galloprovincialis	153.75	-28.25
Mytilus_galloprovincialis	154.25	-28.25
Mytilus_galloprovincialis	150.25	-37.75
Mytilus_galloprovincialis	150.25	-37.25
Mytilus_galloprovincialis	152.75	-31.75
Mytilus_galloprovincialis	153.25	-30.25
Mytilus_galloprovincialis	153.25	-30.75
Mytilus_galloprovincialis	149.75	-37.75
Mytilus_galloprovincialis	154.25	-29.25
Mytilus_galloprovincialis	153.25	-31.25
Mytilus_galloprovincialis	150.25	-36.75
Mytilus_galloprovincialis	154.25	-28.75
Mytilus_galloprovincialis	153.75	-28.75
Mytilus_galloprovincialis	153.75	-29.75
Mytilus_galloprovincialis	151.75	-34.75
Mytilus_galloprovincialis	151.75	-34.25
Mytilus_galloprovincialis	150.75	-35.75
Mytilus_galloprovincialis	150.75	-36.25
Mytilus_galloprovincialis	153.75	-30.25
Mytilus_galloprovincialis	151.75	-33.75
Mytilus_galloprovincialis	153.25	-31.75
Mytilus_galloprovincialis	153.25	-32.25
Mytilus_galloprovincialis	151.75	-33.25
Mytilus_galloprovincialis	152.75	-33.25
Mytilus_galloprovincialis	153.25	-29.75
Mytilus_galloprovincialis	152.75	-32.75
Mytilus_galloprovincialis	153.75	-29.25
Mytilus_galloprovincialis	150.75	-35.25
Mytilus_galloprovincialis	152.25	-32.75
Mytilus_galloprovincialis	150.25	-35.75
Mytilus_galloprovincialis	17.92297	40.18485
Mytilus_galloprovincialis	149.9575	-37.25166
Mytilus_galloprovincialis	146.8094	-41.1101
Mytilus_galloprovincialis	151.2555	-33.84133
Mytilus_galloprovincialis	13.84	43.09
Mytilus_galloprovincialis	-122.3306	37.65848
Mytilus_galloprovincialis	-122.3445	38.0255
Mytilus_galloprovincialis	-122.3465	37.02417
Mytilus_galloprovincialis	-122.28723	37.76709
Mytilus_galloprovincialis	-122.49689	38.11958
Mytilus_galloprovincialis	-1.10195	44.66812
Mytilus_galloprovincialis	141.706667	38.934444
Mytilus_galloprovincialis	149.92332	-37.10333
Mytilus_galloprovincialis	149.883	-37.07999
Mytilus_galloprovincialis	-8.295321	43.384911
Mytilus_galloprovincialis	3.148	57.118
Mytilus_galloprovincialis	133.191111	36.239167
Mytilus_galloprovincialis	-124.20146	43.392325
Mytilus_galloprovincialis	18.507785	40.142833
Mytilus_galloprovincialis	-6.294643	49.958916
Mytilus_galloprovincialis	-84.958233	10.065325
Mytilus_galloprovincialis	-5.04933	50.19341
Mytilus_galloprovincialis	147.584	-40.864
Mytilus_galloprovincialis	-2.072305	49.000744
Mytilus_galloprovincialis	3.2	41.98
Mytilus_galloprovincialis	26.15	39.15
Mytilus_galloprovincialis	-157.969065	21.32272
Mytilus_galloprovincialis	151.14666	-33.99333
Mytilus_galloprovincialis	151.216	-33.96999
Mytilus_galloprovincialis	151.2125	-34.00833
Mytilus_galloprovincialis	-4.933021	50.565381
Mytilus_galloprovincialis	-5.008643	50.154594
Mytilus_galloprovincialis	144.26601	44.015099
Mytilus_galloprovincialis	136.83	35.088902
Mytilus_galloprovincialis	144.9	-37.883333
Mytilus_galloprovincialis	126.744167	26.345833
Mytilus_galloprovincialis	28.959	41.033
Mytilus_galloprovincialis	29.287	40.662
Mytilus_galloprovincialis	-2.4292	48.999968
Mytilus_galloprovincialis	23.45	37.69
Mytilus_galloprovincialis	23.49	37.53
Mytilus_galloprovincialis	-8.35	37.1
Mytilus_galloprovincialis	148.0796	-39.8508
Mytilus_galloprovincialis	147.8813	-39.7613
Mytilus_galloprovincialis	-4.45174	50.3443
Mytilus_galloprovincialis	-3.933725	48.984555
Mytilus_galloprovincialis	-2.301674	49.000372
Mytilus_galloprovincialis	-3.545443	48.990412
Mytilus_galloprovincialis	-3.111973	48.995406
Mytilus_galloprovincialis	-3.628503	48.989269
Mytilus_galloprovincialis	134.669444	34.772222
Mytilus_galloprovincialis	-1.84317	48.87701
Mytilus_galloprovincialis	-1.56307	48.79794
Mytilus_galloprovincialis	-7.63	37.1
Mytilus_galloprovincialis	166.31	-50.488056
Mytilus_galloprovincialis	-8.92	37.01
Mytilus_galloprovincialis	-7.45	37.17
Mytilus_galloprovincialis	144.48	-38.12
Mytilus_galloprovincialis	-1.74805	49.33119
Mytilus_galloprovincialis	-0.51	38.3
Mytilus_galloprovincialis	-0.19	39.06
Mytilus_galloprovincialis	139.31152	35.30693
Mytilus_galloprovincialis	-3.57409	50.32622
Mytilus_galloprovincialis	-4.21543	51.18098
Mytilus_galloprovincialis	-8.59	37.12
Mytilus_galloprovincialis	134.466111	34.781944
Mytilus_galloprovincialis	147.3573	-43.2623
Mytilus_galloprovincialis	146.1004	-43.34551
Mytilus_galloprovincialis	145.584	43.328098
Mytilus_galloprovincialis	149.9733	-37.4
Mytilus_galloprovincialis	175.358333	-36.166667
Mytilus_galloprovincialis	134.583056	34.769722
Mytilus_galloprovincialis	-117.257	32.795
Mytilus_galloprovincialis	17.791895	40.2732
Mytilus_galloprovincialis	12.88	45.6
Mytilus_galloprovincialis	135.021667	34.589722
Mytilus_galloprovincialis	147.9377	-42.8761
Mytilus_galloprovincialis	-9.17911	42.99715
Mytilus_galloprovincialis	8.756	42.562
Mytilus_galloprovincialis	147.9952	-42.4873
Mytilus_galloprovincialis	3.825	39.996
Mytilus_galloprovincialis	12.89	45.25
Mytilus_galloprovincialis	-2.367935	49.434046
Mytilus_galloprovincialis	13.17	45.25
Mytilus_galloprovincialis	146.1491	-43.5019
Mytilus_galloprovincialis	135.196	34.6842
Mytilus_galloprovincialis	135.05901	34.628201
Mytilus_galloprovincialis	135.12399	34.3055
Mytilus_galloprovincialis	134.87801	34.335602
Mytilus_galloprovincialis	146.001	-43.321
Mytilus_galloprovincialis	173.9418	-41.2698
Mytilus_galloprovincialis	172.9436	-43.8316
Mytilus_galloprovincialis	170.6402	-45.8281
Mytilus_galloprovincialis	169.7104	-46.4996
Mytilus_galloprovincialis	144.666667	-38.116667
Mytilus_galloprovincialis	147.0199	-43.2234
Mytilus_galloprovincialis	12.815983	45.568467
Mytilus_galloprovincialis	-9.253467	38.69965
Mytilus_galloprovincialis	-9.408367	38.702333
Mytilus_galloprovincialis	-9.354583	38.685283
Mytilus_galloprovincialis	3.224491	42.045338
Mytilus_galloprovincialis	146.1734	-43.3409
Mytilus_galloprovincialis	147.8939	-43.1385
Mytilus_galloprovincialis	147.7	-37.95
Mytilus_galloprovincialis	141.933	39.3834
Mytilus_galloprovincialis	144.5	-38.08
Mytilus_galloprovincialis	135.246	34.358501
Mytilus_galloprovincialis	144.683	-37.9833
Mytilus_galloprovincialis	13.01	43.91
Mytilus_galloprovincialis	13.62	43.64
Mytilus_galloprovincialis	13.93	43.01
Mytilus_galloprovincialis	12.89	45.19
Mytilus_galloprovincialis	12.8	44.35
Mytilus_galloprovincialis	134.939	34.2966
Mytilus_galloprovincialis	141.159	38.375801
Mytilus_galloprovincialis	134.30901	34.4832
Mytilus_galloprovincialis	13.24	45.31
Mytilus_galloprovincialis	12.84	44.98
Mytilus_galloprovincialis	13.25	44.01
Mytilus_galloprovincialis	14.17	43.11
Mytilus_galloprovincialis	12.374167	45.413056
Mytilus_galloprovincialis	144.8578	-40.4691
Mytilus_galloprovincialis	169.1633	-52.5467
Mytilus_galloprovincialis	166.218307	-50.544998
Mytilus_galloprovincialis	139.757	34.970299
Mytilus_galloprovincialis	140.61	36.403198
Mytilus_galloprovincialis	144.667	-37.9167
Mytilus_galloprovincialis	5.098	43.33
Mytilus_galloprovincialis	150.766	-34.9
Mytilus_galloprovincialis	132.259	34.275002
Mytilus_galloprovincialis	15.28	37.03
Mytilus_galloprovincialis	8.15	43.96
Mytilus_galloprovincialis	145	-38
Mytilus_galloprovincialis	144.666667	-38.266667
Mytilus_galloprovincialis	135.20799	35.540001
Mytilus_galloprovincialis	152.083	-32.7
Mytilus_galloprovincialis	148.2674	-41.0403
Mytilus_galloprovincialis	-2.557	48.602
Mytilus_galloprovincialis	29.663	40.704
Mytilus_galloprovincialis	29.873	41.14
Mytilus_galloprovincialis	29.085	40.871
Mytilus_galloprovincialis	26.333	40.027
Mytilus_galloprovincialis	-0.65483	50.74684
Mytilus_galloprovincialis	-1.602	48.836
Mytilus_galloprovincialis	150.72249	-35.00833
Mytilus_galloprovincialis	-117.782	33.542
Mytilus_galloprovincialis	3.136919	42.482558
Mytilus_galloprovincialis	150.533	-35.25
Mytilus_galloprovincialis	158.9346	-54.52188
Mytilus_galloprovincialis	-2.75971	51.48993
Mytilus_galloprovincialis	135.34705	34.70866
Mytilus_galloprovincialis	28.576813	43.499088
Mytilus_galloprovincialis	146.3	-39.03
Mytilus_galloprovincialis	3.11	42.201
Mytilus_galloprovincialis	150.13944	-36.22054
Mytilus_galloprovincialis	166.088303	-50.7167
Mytilus_galloprovincialis	166.146698	-50.729198
Mytilus_galloprovincialis	-5.14	36.42
Mytilus_galloprovincialis	147.6457	-42.9461
Mytilus_galloprovincialis	151.3386	-33.51555
Mytilus_galloprovincialis	6.857	43.42
Mytilus_galloprovincialis	13.6333	45.7667
Mytilus_galloprovincialis	14.57	45.02
Mytilus_galloprovincialis	14.5785	45.0274
Mytilus_galloprovincialis	145.164	-40.802
Mytilus_galloprovincialis	151.255	-33.95
Mytilus_galloprovincialis	1.442936	38.913312
Mytilus_galloprovincialis	4.29318	39.878216
Mytilus_galloprovincialis	2.708963	39.581119
Mytilus_galloprovincialis	135.06172	34.26633
Mytilus_galloprovincialis	136.1627	-34.3398
Mytilus_galloprovincialis	151.583	-33.45
Mytilus_galloprovincialis	2.694138	39.79531
Mytilus_galloprovincialis	139.745556	35.256389
Mytilus_galloprovincialis	145.617	-40.928
Mytilus_galloprovincialis	16.2517	43.5125
Mytilus_galloprovincialis	147.733	-43.123
Mytilus_galloprovincialis	150.13583	-36.07499
Mytilus_galloprovincialis	150.47499	-35.35833
Mytilus_galloprovincialis	10.53332	57.43332
Mytilus_galloprovincialis	147.24	-43.266
Mytilus_galloprovincialis	147.0343	-43.0746
Mytilus_galloprovincialis	166.066696	-50.849998
Mytilus_galloprovincialis	166.033295	-50.763302
Mytilus_galloprovincialis	169.166702	-53.5833
Mytilus_galloprovincialis	147.5395	-42.7849
Mytilus_galloprovincialis	169.149994	-52.563301
Mytilus_galloprovincialis	166.259995	-50.82
Mytilus_galloprovincialis	147.8326	-39.8338
Mytilus_galloprovincialis	151.1	-34.066
Mytilus_galloprovincialis	4.433	43.45
Mytilus_galloprovincialis	6.15	43.064
Mytilus_galloprovincialis	151.466	-34.1
Mytilus_galloprovincialis	-5.06299	51.68172
Mytilus_galloprovincialis	-5.16803	51.71491
Mytilus_galloprovincialis	9.37	44.29
Mytilus_galloprovincialis	18.0886	42.6506
Mytilus_galloprovincialis	18.0833	42.6667
Mytilus_galloprovincialis	169.199997	-52.599998
Mytilus_galloprovincialis	167.442583	-47.044194
Mytilus_galloprovincialis	4.05	43.516
Mytilus_galloprovincialis	172.691111	-40.585556
Mytilus_galloprovincialis	149.933	-37.566
Mytilus_galloprovincialis	150.116	-36.05
Mytilus_galloprovincialis	151.60194	-33.13388
Mytilus_galloprovincialis	145.2636	-42.1448
Mytilus_galloprovincialis	169.27	-52.566667
Mytilus_galloprovincialis	166.15	-50.85
Mytilus_galloprovincialis	166.216667	-50.663333
Mytilus_galloprovincialis	150.17499	-35.85
Mytilus_galloprovincialis	6.983333	43.55
Mytilus_galloprovincialis	-8.874392	41.798976
Mytilus_galloprovincialis	29.863142	31.192419
Mytilus_galloprovincialis	175.098056	-36.785556
Mytilus_galloprovincialis	-8.897253	38.518829
Mytilus_galloprovincialis	-8.542543	37.117338
Mytilus_galloprovincialis	-8.667032	37.100687
Mytilus_galloprovincialis	149.75979	-37.55646
Mytilus_galloprovincialis	149.9075	-37.05416
Mytilus_galloprovincialis	-4.68715	51.71161
Mytilus_galloprovincialis	152.14471	-32.72138
Mytilus_galloprovincialis	-9.05273	38.82259
Mytilus_galloprovincialis	-124.227905	40.973677
Mytilus_galloprovincialis	10.233333	43.866667
Mytilus_galloprovincialis	9.283333	41.583333
Mytilus_galloprovincialis	-8.783333	40.65
Mytilus_galloprovincialis	-9.35	39.366667
Mytilus_galloprovincialis	-2.5	43.416667
Mytilus_galloprovincialis	-4.5	43.383333
Mytilus_galloprovincialis	-8.883333	37.016667
Mytilus_galloprovincialis	-9.3	42.9
Mytilus_galloprovincialis	174.116389	-35.262778
Mytilus_galloprovincialis	174.892889	-41.286722
Mytilus_galloprovincialis	168.666667	-50.516667
Mytilus_galloprovincialis	175.416917	-36.197278
Mytilus_galloprovincialis	167.672222	-46.354444
Mytilus_galloprovincialis	174.504833	-35.815028
Mytilus_galloprovincialis	168	-46.883333
Mytilus_galloprovincialis	172.783333	-43.566667
Mytilus_galloprovincialis	169.166667	-52.533333
Mytilus_galloprovincialis	172.739167	-43.613889
Mytilus_galloprovincialis	138.516353	-35.035531
Mytilus_galloprovincialis	147.7522	-43.2094
Mytilus_galloprovincialis	147.7459	-43.1977
Mytilus_galloprovincialis	148.2887	-41.5562
Mytilus_galloprovincialis	147.9575	-39.7306
Mytilus_galloprovincialis	147.3598	-40.9735
Mytilus_galloprovincialis	147.6887	-40.841
Mytilus_galloprovincialis	146.6195	-41.1338
Mytilus_galloprovincialis	1.55	52.116669
Mytilus_galloprovincialis	-5.341389	36.126667
Mytilus_galloprovincialis	-9.316667	32.266666
Mytilus_galloprovincialis	17.6212	40.302667
Mytilus_galloprovincialis	27.965	-32.974722
Mytilus_galloprovincialis	27.833333	-33.066667
Mytilus_galloprovincialis	3.283333	51.8
Mytilus_galloprovincialis	27.906389	-33.024444
Mytilus_galloprovincialis	28.25	-32.75
Mytilus_galloprovincialis	28.133333	-32.8
Mytilus_galloprovincialis	21.916667	-34.283333
Mytilus_galloprovincialis	21.433333	-34.366667
Mytilus_galloprovincialis	27.6	-33.2
Mytilus_galloprovincialis	8.577433	44.358317
Mytilus_galloprovincialis	12.762467	43.966717
Mytilus_galloprovincialis	8.189067	44.015683
Mytilus_galloprovincialis	-5.485	36.055
Mytilus_galloprovincialis	-8.7499	42.2463
Mytilus_galloprovincialis	148	-37.88
Mytilus_galloprovincialis	144.65	-38.09
Mytilus_galloprovincialis	-1.7734	43.3627
Mytilus_galloprovincialis	8.4915	39.9053
Mytilus_galloprovincialis	35.2036	46.3683
Mytilus_galloprovincialis	30.7642	46.469
Mytilus_galloprovincialis	144.78	-38.24
Mytilus_galloprovincialis	144.99	-37.99
Mytilus_galloprovincialis	144.96	-38.3
Mytilus_galloprovincialis	16.44	43.51
Mytilus_galloprovincialis	135.88	-37.69
Mytilus_galloprovincialis	137.46	-33.91
Mytilus_galloprovincialis	128.333333	34.75
Mytilus_galloprovincialis	126.533333	36.983333
Mytilus_galloprovincialis	6.20264	42.99649
Mytilus_galloprovincialis	3.06116	42.85443
Mytilus_galloprovincialis	140.64502	41.04169
Mytilus_galloprovincialis	141.1441	40.86882
Mytilus_galloprovincialis	140.64522	40.98222
Mytilus_galloprovincialis	139.62024	35.14215
Mytilus_galloprovincialis	139.95	39.9
Mytilus_galloprovincialis	-25.2	37.733333
Mytilus_galloprovincialis	13.7	43.287032
Mytilus_galloprovincialis	10.745383	33.861
Mytilus_galloprovincialis	23.453643	37.690273
Mytilus_galloprovincialis	14.992133	36.700533
Mytilus_galloprovincialis	-48.5434	-27.1879
Mytilus_galloprovincialis	-48.5408	-27.4881
Mytilus_galloprovincialis	-48.5648	-27.7502
Mytilus_galloprovincialis	-48.634	-27.7351
Mytilus_galloprovincialis	-48.553	-27.3075
